# Supplementary material for: Radiogenomics in Hepatocellular Carcinoma: Machine Learning Based CT Texture Analysis in Predicting β-Catenin Mutation Status
Source: Research Square preprint supplement (doi:10.21203/rs.3.rs-203679/v1), 2021-02-22
Supplement: Supplementary file 1 [file f22d317d27319fcafa8d3bdd.docx]

**Supplementary information file**

**Title:** Radiogenomics in Hepatocellular Carcinoma: Machine Learning Based CT Texture Analysis in Predicting β-Catenin Mutation Status

**Authors and affiliations:**

ZiYi Guo1, LiPeng Jiang2, ZhiTu Zhu3*

1. ZiYi Guo, MD, Department of Radiology, The First Affiliated Hospital of JinZhou Medical University, Jinzhou, China
2. LiPeng Jiang ,MD, Department of radiotherapy, The First Affiliated Hospital of JinZhou Medical University, Jinzhou, China
3. ZhiTu Zhu , MD, Department of Tumor Treatment Center, The First Affiliated Hospital of JinZhou Medical University, Jinzhou, China

*Correspondence: ZhiTu Zhu, MD, Department of Tumor Treatment Center, The First Affiliated Hospital of JinZhou Medical University, JinZhou Medical University, JinZhou 121000, China

Phone: +86-18004961512, Email: [zhu-zhitu@163.com](mailto:zhu_zhitu@163.com).

**Appendix:** the patient ID in TCGA-LIHC database used in this study

(1) with beta-catenin mutation (15 patients) TCGA-DD-A1EA,TCGA-DD-A1ED,TCGA-DD-A1EJ,TCGA-DD-A1EL,TCGA-DD-A4NI,TCGA-DD-A4NK,TCGA-DD-A4NL,TCGA-DD-A39Y,TCGA-DD-A116,TCGA-DD-A119,TCGA-G3-A3CK,TCGA-G3-A5SJ,TCGA-G3-AAV4,TCGA-G3-AAV5,TCGA-K7-A6G5.

(2) without beta-catenin mutation (28 patients)

TGGA-BC-A3KF,TGGA-BC-A10W,TGGA-BC-A10Z,TGGA-BC-A69H,TGGA-DD-A1EC,TGGA-DD-A1EH,TGGA-DD-A1EK,TGGA-DD-A3A1,TGGA-DD-A3A9,TGGA-DD-A4N4,TGGA-DD-A4ND,TGGA-DD-A4NE,TGGA-DD-A4NG,TGGA-DD-A4NN,TGGA-DD-A4NV,TGGA-DD-A11A,TGGA-DD-A11C,TGGA-DD-A113,TGGA-DD-A115,TGGA-G3-A3CG,TGGA-G3-A3CH,TGGA-G3-A3CI,TGGA-G3-A7M8,TGGA-G3-A25S,TGGA-G3-A25U,TGGA-G3-A25Y,TGGA-G3-AAUZ,TGGA-K7-A5RG.
